# Supplementary material for: High-performance deep ultraviolet photodetectors based on few-layer hexagonal boron nitride
Source: Royal Society of Chemistry journal article supplement (doi:10.1039/c7nr09438h), 2018-01-01
Supplement: c7nr09438h1.pdf [file c7nr09438h1.pdf]

Electronic Supplementary Information for

**High-Performance Deep Ultraviolet Photodetectors Based on Few-Layer Hexagonal Boron Nitride**

Heng Liu,<sup>a,b</sup> Junhua Meng,<sup>a,b</sup> Xingwang Zhang,<sup>\*a,b</sup> Yanan Chen,<sup>a,b</sup> Zhigang Yin,<sup>a,b</sup> Denggui Wang,<sup>a,b</sup> Ye Wang,<sup>a,b</sup> Jingbi You,<sup>a,b</sup> Menglei Gao,<sup>a,b</sup> and Peng Jin<sup>a,b</sup>

<sup>a</sup>. Key Laboratory of Semiconductor Materials Science, Institute of Semiconductors, Chinese Academy of Sciences, Beijing, 100083, P. R. China

<sup>b</sup>. College of Materials Science and Opto-electronic Technology, University of Chinese Academy of Sciences, Beijing 100049, P. R. China

\* E-mail: [xwzhang@semi.ac.cn](mailto:xwzhang@semi.ac.cn)

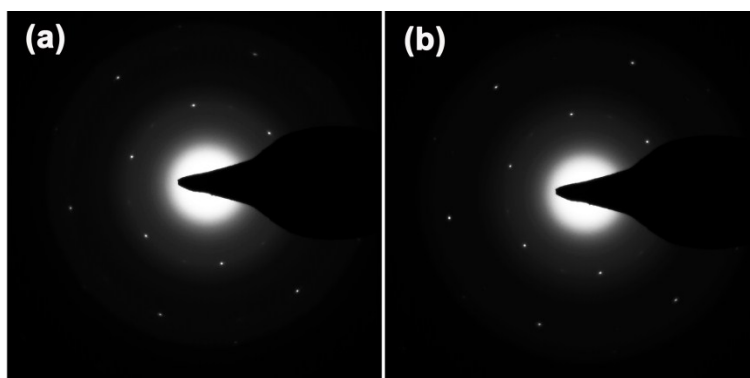

**Figure S1.** The SAED patterns recorded at different locations on the same h-BN domain have identical orientation, implying the single-crystal nature of h-BN domain.

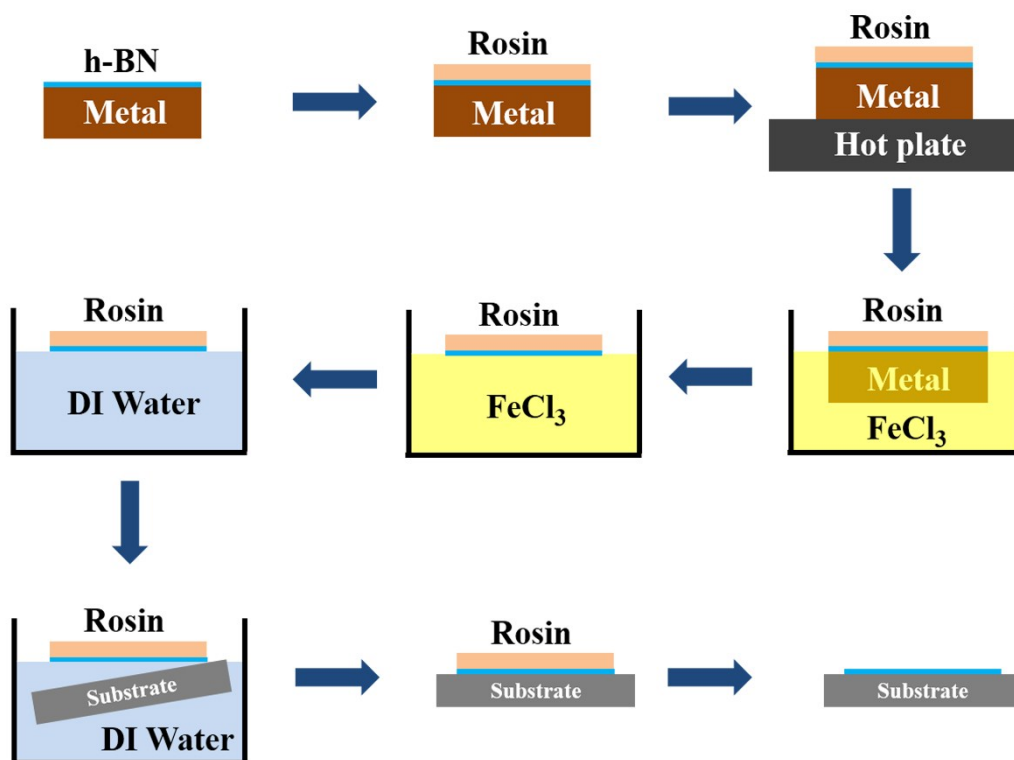

**Figure S2.** Schematic diagram of the h-BN transfer by a rosin-assisted wet-transfer method.

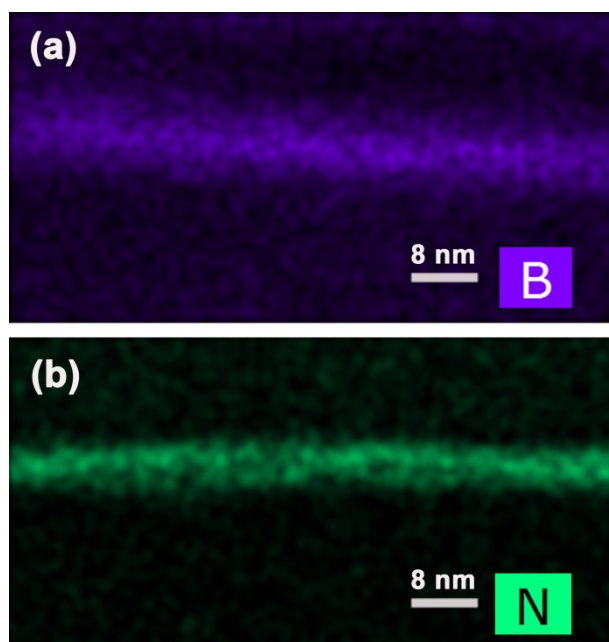

**Figure S3.** The EDX spectroscopy elemental mappings of B and N for the h-BN layer transferred onto a SiO<sub>2</sub>/Si substrate.

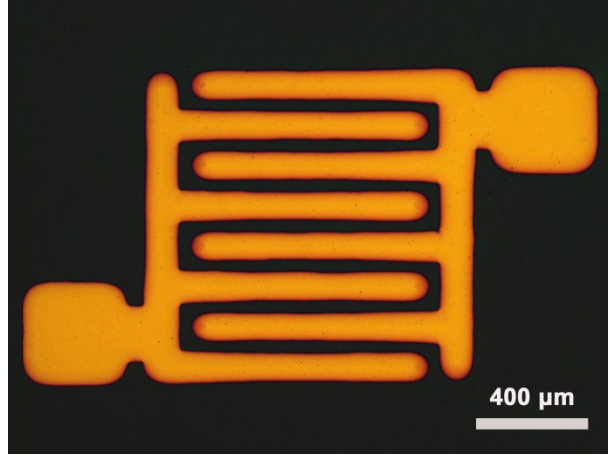

**Figure S4.** Optical micrograph of the h-BN DUV photodetector.

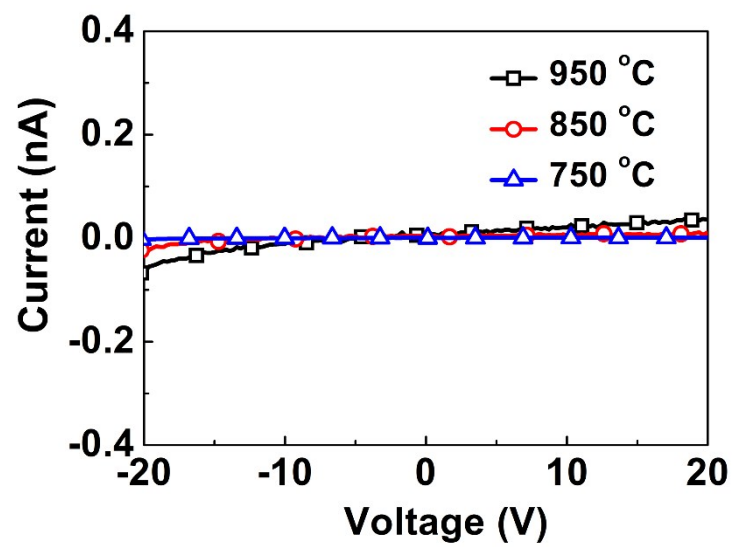

**Figure S5.** The I-V curves of h-BN photodetectors measured in the dark. The devices were fabricated from the h-BN layers grown at different temperatures.

**Table S1.** Comparison of the photoresponse parameters between the h-BN photodetectors and DUV photodetectors fabricated from other wide band gap semiconductors.

| Materials                               | Cut off wavelength (nm) | Dark current | Responsivity (mA/W) | On/off ratio    | Ref.      |
|-----------------------------------------|-------------------------|--------------|---------------------|-----------------|-----------|
| Diamond                                 | 225                     | 1.1 pA/5 V   | 48                  | 10 <sup>4</sup> | 1         |
| $\beta$ -Ga <sub>2</sub> O <sub>3</sub> | 250                     | 1200 pA/10 V | 37                  | 10 <sup>3</sup> | 2         |
| Mg <sub>x</sub> Zn <sub>1-x</sub> O     | 273                     | 20 pA/15 V   | 0.1                 | 10 <sup>4</sup> | 3         |
| AlN                                     | 240                     | 0.1 pA/100 V | 400                 | /               | 4         |
| SiC                                     | 310                     | 100 pA/100 V | 70                  | 10 <sup>3</sup> | 5         |
| h-BN                                    | 250                     | 200 nA/4 V   | 1.5                 | <5              | 6         |
| h-BN                                    | 250                     | 4 nA/4 V     | 0.09                | /               | 7         |
| h-BN                                    | 225                     | 20 pA/20 V   | 0.1                 | 10 <sup>3</sup> | This Work |

1. A. BenMoussa, A. Soltani, K. Haenen, U. Kroth, V. Mortet, H. A. Barkad, D. Bolsee, C. Hermans, M. Richter, J. C. De Jaeger and J. F. Hochedez, *Semicond. Sci. Technol.*, 2008, **23**, 035026.
2. T. Oshima, T. Okuno and S. Fujita, *J. Appl. Phys.*, 2007, **46**, 7217–7220.
3. Z. G. Ju, C. X. Shan, D. Y. Jiang, J. Y. Zhang, B. Yao, D. X. Zhao, D. Z. Shen and X. W. Fan, *Appl. Phys. Lett.*, 2008, **93**, 173505.
4. J. Li, Z. Y. Fan, R. Dahal, M. L. Nakarmi, J. Y. Lin and H. X. Jiang, *Appl. Phys. Lett.*, 2006, **89**, 213510.
5. Y.-Z. Chiou, *J. Appl. Phys.*, 2004, **43**, 2432–2434.
6. A. F. Zhou, A. Aldalbahi and P. Feng, *Opt. Mater. Express*, 2016, **6**, 3286-3292.
7. M. Rivera, R. Velázquez, A. Aldalbahi, A. F. Zhou and P. Feng, *Sci. Rep.*, 2017, **7**, 42973.
